# Supplementary material for: Multiple thermal magnetic relaxation in a two-dimensional ferromagnetic dysprosium(iii) metal–organic framework
Source: Royal Society of Chemistry journal article supplement (doi:10.1039/c5ra23638j), 2015-01-01
Supplement: c5ra23638j1.pdf [file c5ra23638j1.pdf]

## Supporting Information for

# Multiple thermal magnetic relaxation in a two-dimensional ferromagnetic dysprosium(III) metal-organic framework

Cai-Ming Liu,<sup>a,\*</sup> Jin Xiong,<sup>b</sup> De-Qing Zhang,<sup>a</sup> Bing-Wu Wang,<sup>b,\*</sup> and Dao-Ben Zhu<sup>a</sup>

<sup>a</sup> Beijing National Laboratory for Molecular Sciences, Center for Molecular Science, Key Laboratory of Organic Solids, Institute of Chemistry, Chinese Academy of Sciences, Beijing 100190, P. R. China. E-mail: cmliu@iccas.ac.cn

<sup>b</sup> State Key Laboratory of Rare Earth Materials Chemistry and Applications, College of Chemistry and Molecular Engineering, Peking University, Beijing 100871, P. R. China. E-mail: wangbw@pku.edu.cn

Table S1. Continuous Shape Measures calculation for the Dy(III) ions in complex **1**.

Dy1, nine-coordination

| Dy1    | EP-9   | OPY-9  | HBPY-9 | JTC-9  | JCCU-9 | CCU-9 | JCSAPR-9 | CSAPR-9 | JTCTPR-9 | TCTPR-9 | JTDIC-9 | HH-9  | MFF-9 |
|--------|--------|--------|--------|--------|--------|-------|----------|---------|----------|---------|---------|-------|-------|
| ABOXIY | 33.716 | 23.895 | 17.892 | 13.309 | 8.801  | 7.612 | 2.174    | 1.217   | 1.912    | 1.210   | 11.301  | 11.61 | 1.797 |

|          |   |     |                                   |
|----------|---|-----|-----------------------------------|
| EP-9     | 1 | D9h | Enneagon                          |
| OPY-9    | 2 | C8v | Octagonal pyramid                 |
| HBPY-9   | 3 | D7h | Heptagonal bipyramid              |
| JTC-9    | 4 | C3v | Johnson triangular cupola J3      |
| JCCU-9   | 5 | C4v | Capped cube J8                    |
| CCU-9    | 6 | C4v | Spherical-relaxed capped cube     |
| JCSAPR-9 | 7 | C4v | Capped square antiprism J10       |
| CSAPR-9  | 8 | C4v | Spherical capped square antiprism |

|          |    |     |                                    |
|----------|----|-----|------------------------------------|
| JTCTPR-9 | 9  | D3h | Tricapped trigonal prism J51       |
| TCTPR-9  | 10 | D3h | Spherical tricapped trigonal prism |
| JTDIC-9  | 11 | C3v | Tridiminished icosahedron J63      |
| HH-9     | 12 | C2v | Hula-hoop                          |
| MFF-9    | 13 | Cs  | Muffin                             |

Dy2, eight-coordination

| Dy2    | OP-8   | HPY-8  | HBPY-8 | CU-8  | SAPR-8 | TDD-8 | JGBF-8 | JETBPY-8 | JBTPR-8 | BTPR-8 | JSD-8 | TT-8   | ETBPY-8 |
|--------|--------|--------|--------|-------|--------|-------|--------|----------|---------|--------|-------|--------|---------|
|        |        | 8      | 8      |       |        |       |        | 8        |         |        |       |        | 8       |
| ABOXIY | 30.363 | 23.407 | 16.796 | 9.798 | 0.366  | 1.872 | 16.253 | 28.942   | 2.580   | 1.725  | 4.911 | 10.547 | 24.476  |

|          |    |     |                                            |
|----------|----|-----|--------------------------------------------|
| OP-8     | 1  | D8h | Octagon                                    |
| HPY-8    | 2  | C7v | Heptagonal pyramid                         |
| HBPY-8   | 3  | D6h | Hexagonal bipyramid                        |
| CU-8     | 4  | Oh  | Cube                                       |
| SAPR-8   | 5  | D4d | Square antiprism                           |
| TDD-8    | 6  | D2d | Triangular dodecahedron                    |
| JGBF-8   | 7  | D2d | Johnson gyrobifastigium J26                |
| JETBPY-8 | 8  | D3h | Johnson elongated triangular bipyramid J14 |
| JBTPR-8  | 9  | C2v | Biaugmented trigonal prism J50             |
| BTPR-8   | 10 | C2v | Biaugmented trigonal prism                 |
| JSD-8    | 11 | D2d | Snub diphenoid J84                         |
| TT-8     | 12 | Td  | Triakis tetrahedron                        |
| ETBPY-8  | 13 | D3h | Elongated trigonal bipyramid               |

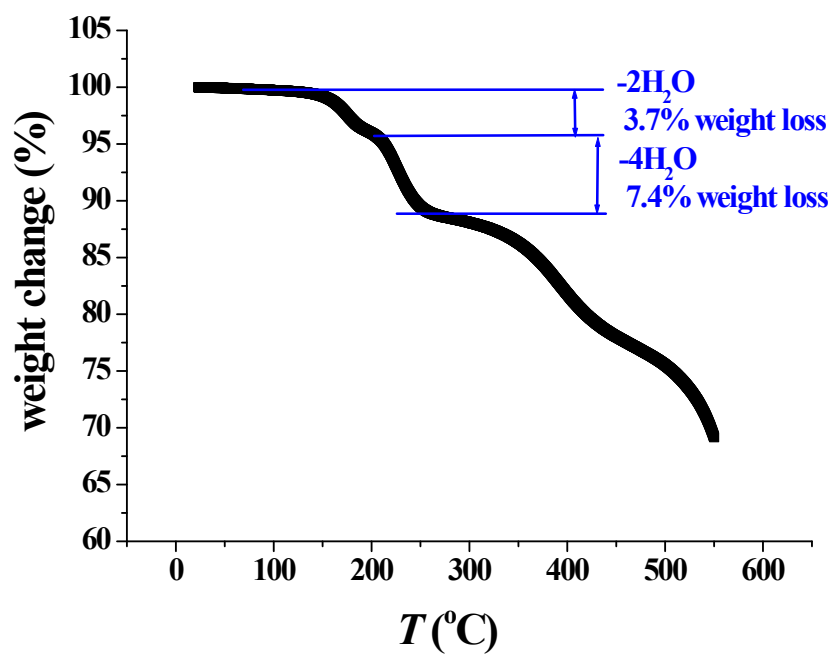

Fig. S1. TGA curve for complex 1.

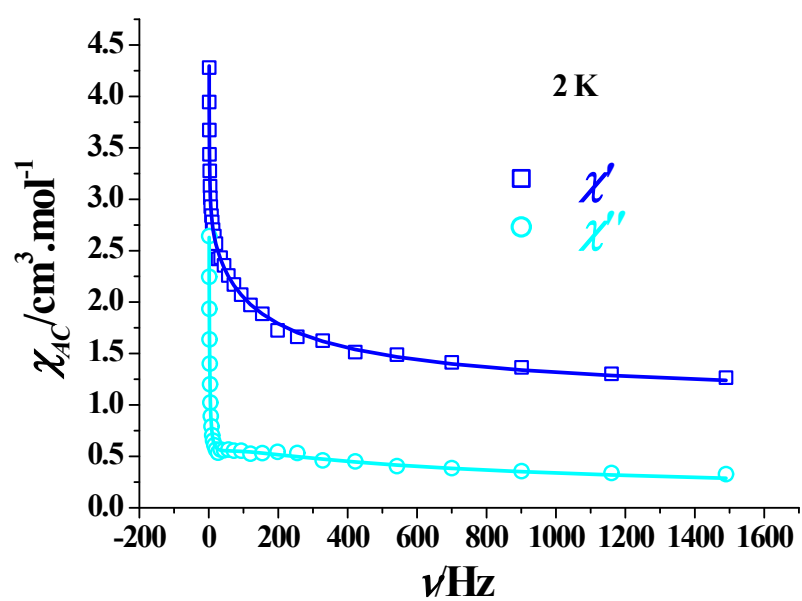

**Fig. S2.** Frequency dependence of the in-phase ( $\chi'$ , top) and out-of-phase ( $\chi''$ , bottom) ac susceptibility of **1** at 2 K. the solid lines represent the best fitting with the sum of two modified Debye functions

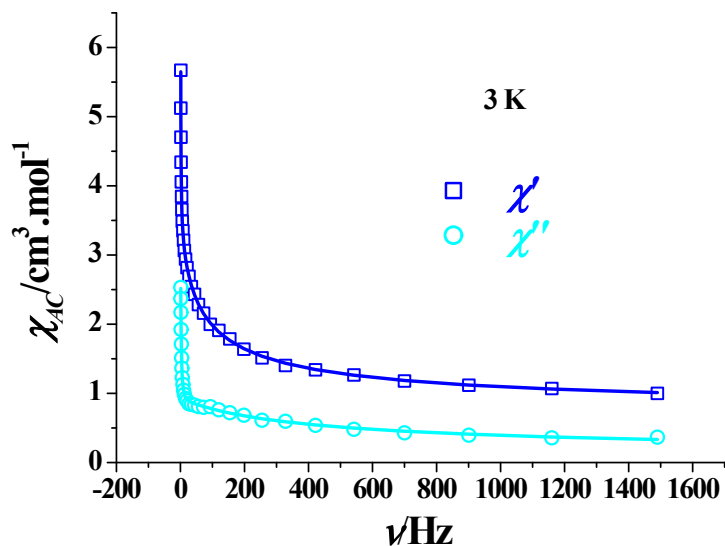

**Fig. S3.** Frequency dependence of the in-phase ( $\chi'$ , top) and out-of-phase ( $\chi''$ , bottom) ac susceptibility of **1** at 3 K. the solid lines represent the best fitting with the sum of two modified Debye functions.

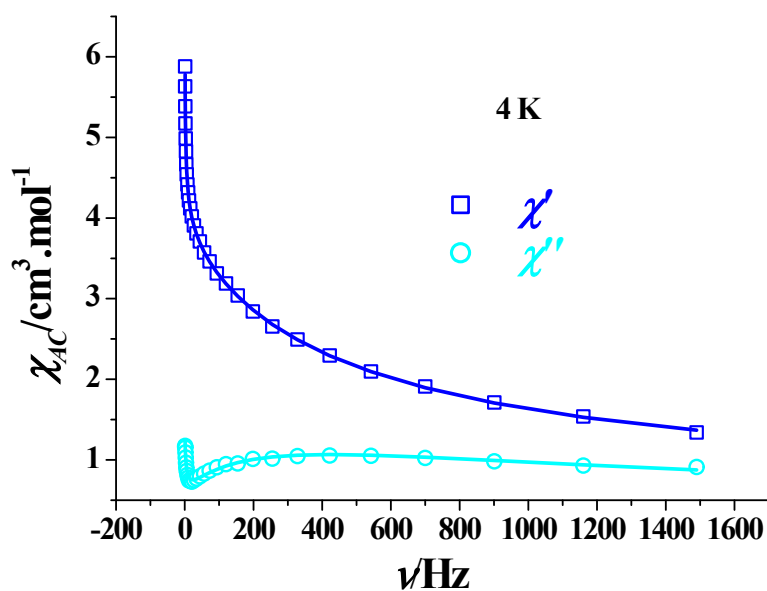

**Fig. S4.** Frequency dependence of the in-phase ( $\chi'$ , top) and out-of-phase ( $\chi''$ , bottom) ac susceptibility of **1** at 4 K. the solid lines represent the best fitting with the sum of

two modified Debye functions.

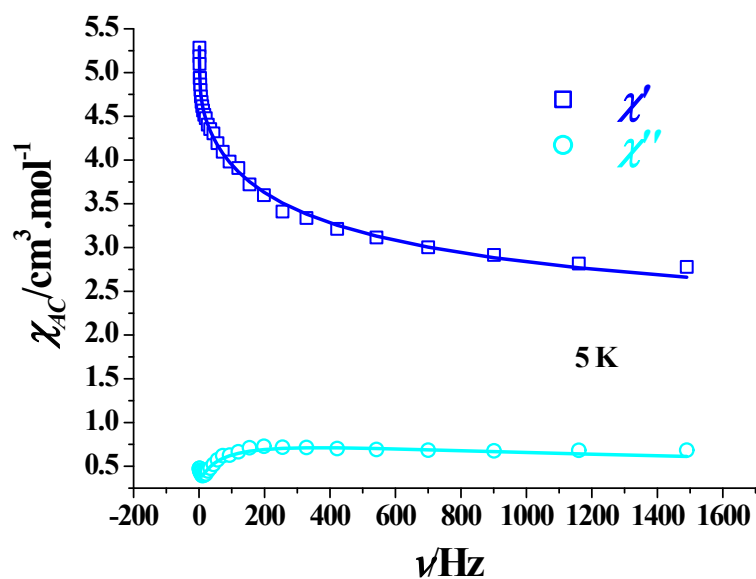

**Fig. S5.** Frequency dependence of the in-phase ( $\chi'$ , top) and out-of-phase ( $\chi''$ , bottom) ac susceptibility of **1** at 5 K. the solid lines represent the best fitting with the sum of two modified Debye functions.

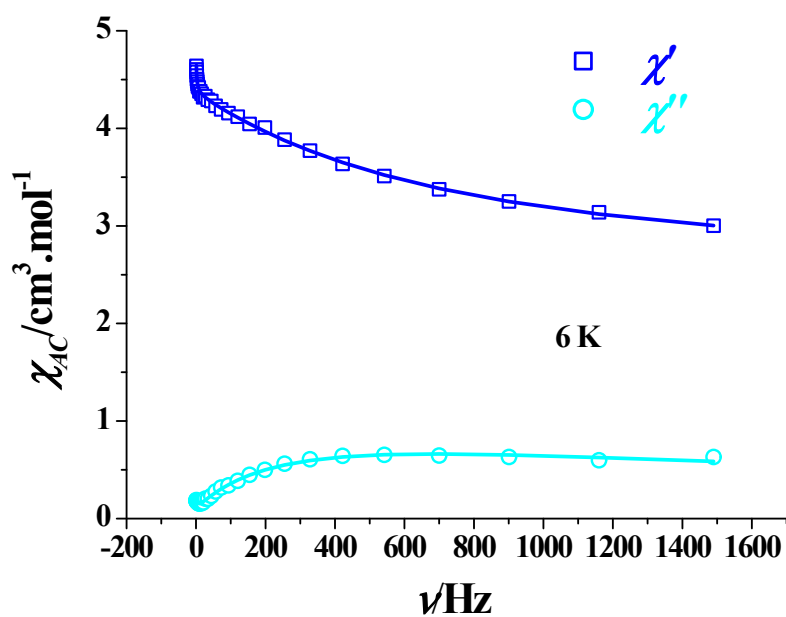

**Fig. S6.** Frequency dependence of the in-phase ( $\chi'$ , top) and out-of-phase ( $\chi''$ , bottom)

ac susceptibility of **1** at 6 K. the solid lines represent the best fitting with the sum of two modified Debye functions.

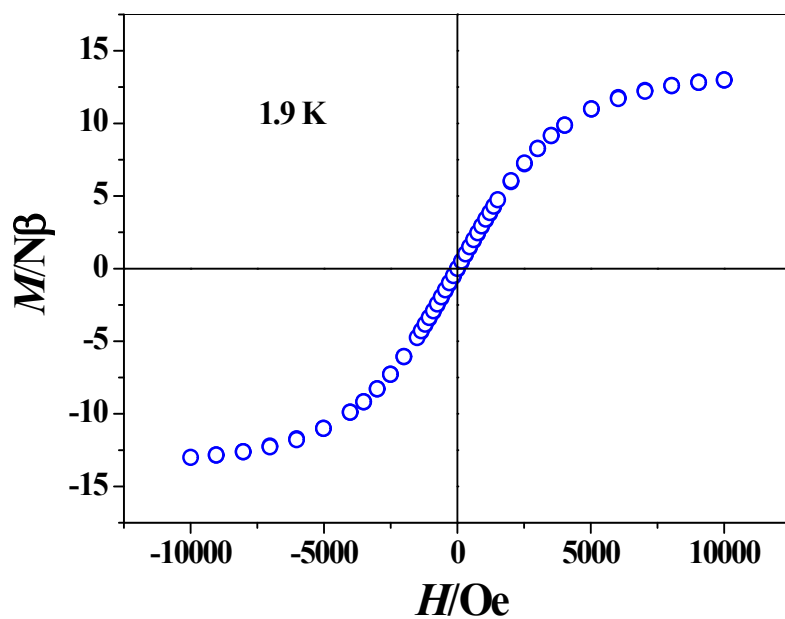

**Figure S7.** Plot of  $M$  versus  $H$  at 1.9 K from  $-10000$  to  $10000$  Oe for **1**.

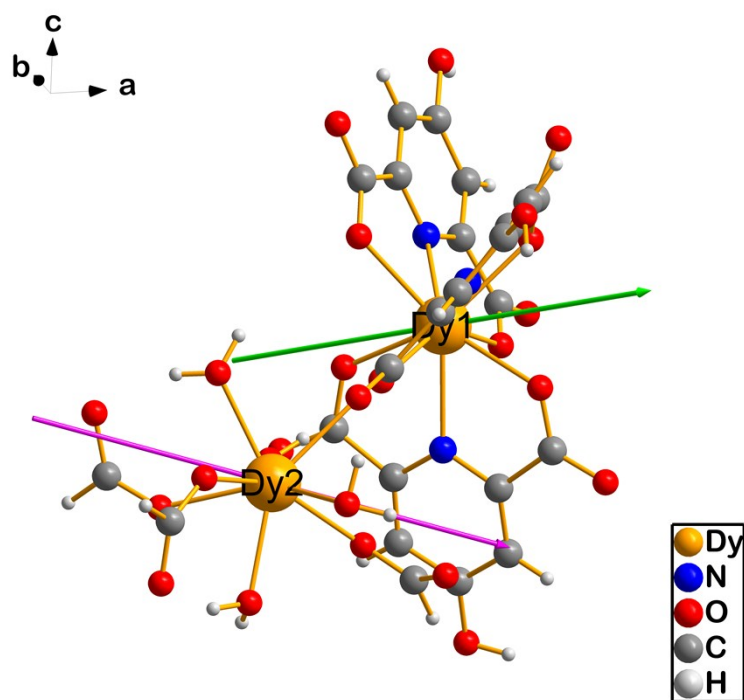

**Figure S8.** The fragment for CASSCF/RASSI calculations. The vectors are the

calculated easy axes (green for Dy1 and pink for Dy2).

**Table S2.** Linear combination of two modified Debye model fitting parameters from 2 K to 6 K of **1** under 2k Oe dc field.

| $T(\text{K})$ | $\chi_2(\text{cm}^3.\text{mol}^{-1})$ | $\chi_1(\text{cm}^3.\text{mol}^{-1})$ | $\chi_0(\text{cm}^3.\text{mol}^{-1})$ | $\tau_1(\text{s})$ | $\alpha_1$ | $\tau_2(\text{s})$ | $\alpha_2$ |
|---------------|---------------------------------------|---------------------------------------|---------------------------------------|--------------------|------------|--------------------|------------|
| 2             | 13.6195                               | 2.87424                               | 0.94387                               | 0.00114            | 0.40658    | 0.6535             | 0.16444    |
| 3             | 9.40215                               | 3.77649                               | 0.66312                               | 0.00257            | 0.44481    | 0.22462            | 0.10008    |
| 4             | 9.64635                               | 3.7187                                | 0.37426                               | 0.00031            | 0.33492    | 0.43189            | 0.48279    |
| 5             | 5.74306                               | 4.9487                                | 1.67699                               | 0.00042            | 0.48001    | 0.1375             | 0.04474    |
| 6             | 4.90616                               | 2.41576                               | 4.36308                               | 0.00023            | 0.24372    | 0.14306            | 0.2792     |
